# Supplementary material
Source: Springer Nature journal article supplement (https://www.springermedizin.de/resource/supplementary/12950_2009_143_MOESM2_ESM.pdf/9558052)

**A.**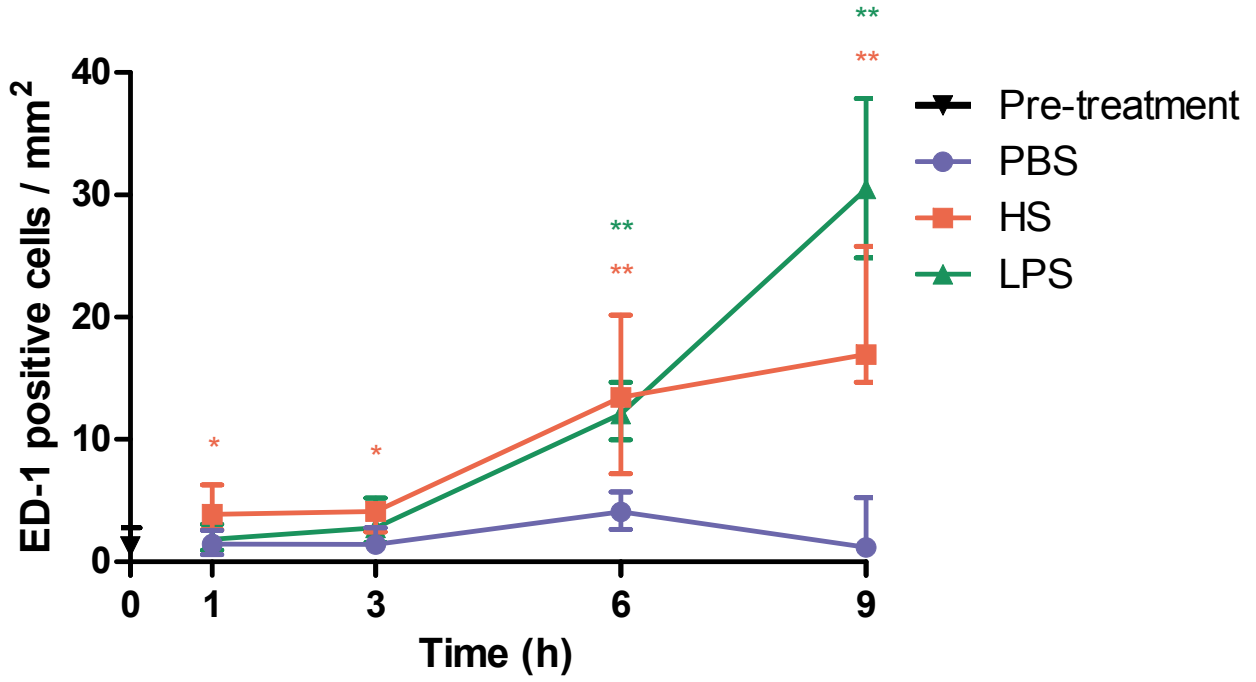**B.**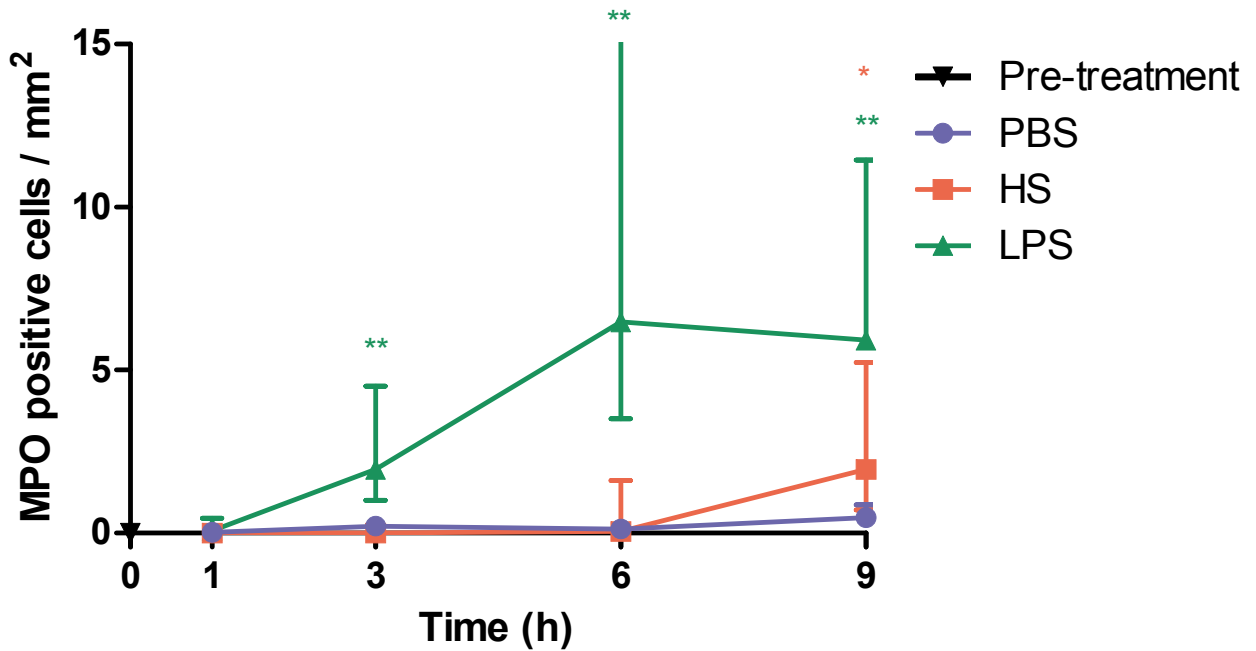

Supplement: MOESM2 [file 9558052]
